# Supplementary material
Source: Springer Nature journal article supplement (https://www.springermedizin.de/resource/supplementary/13075_2012_3667_MOESM4_ESM.pdf/9695072)

SSA/Ro 60kD

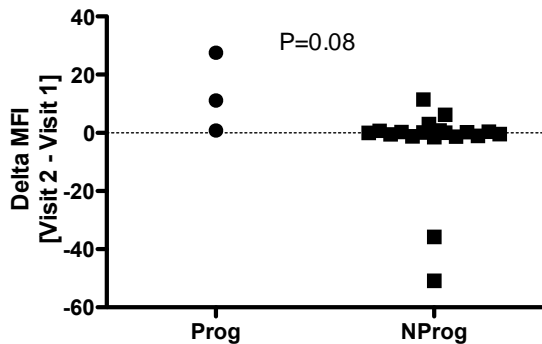

La/SSB

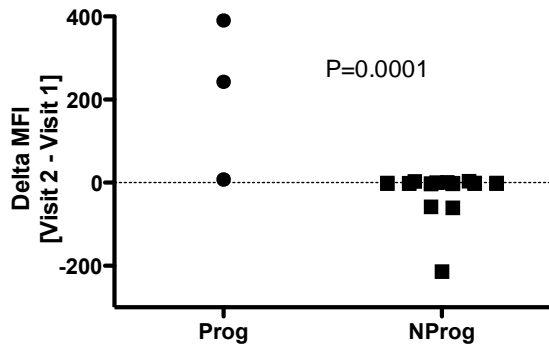

SSA/SSB

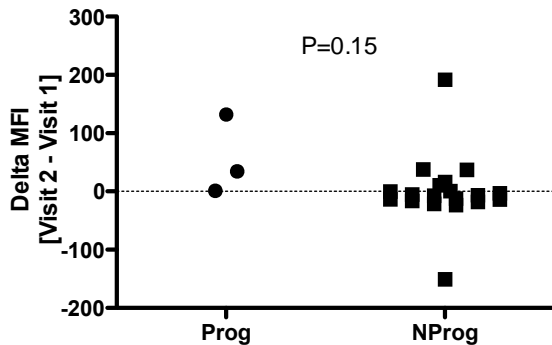

LC1

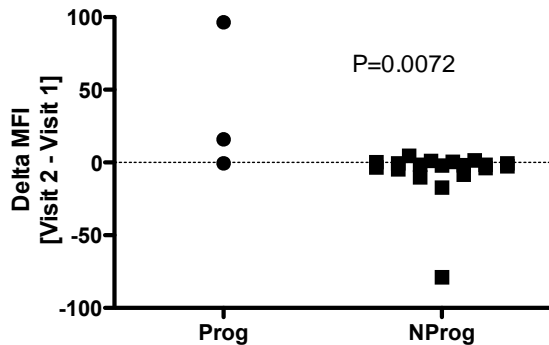

Supplement: MOESM4 [file 9695072]
